# Supplementary material
Source: Springer Nature journal article supplement (https://www.springermedizin.de/resource/supplementary/13051_2010_191_MOESM3_ESM.pdf/9670120)

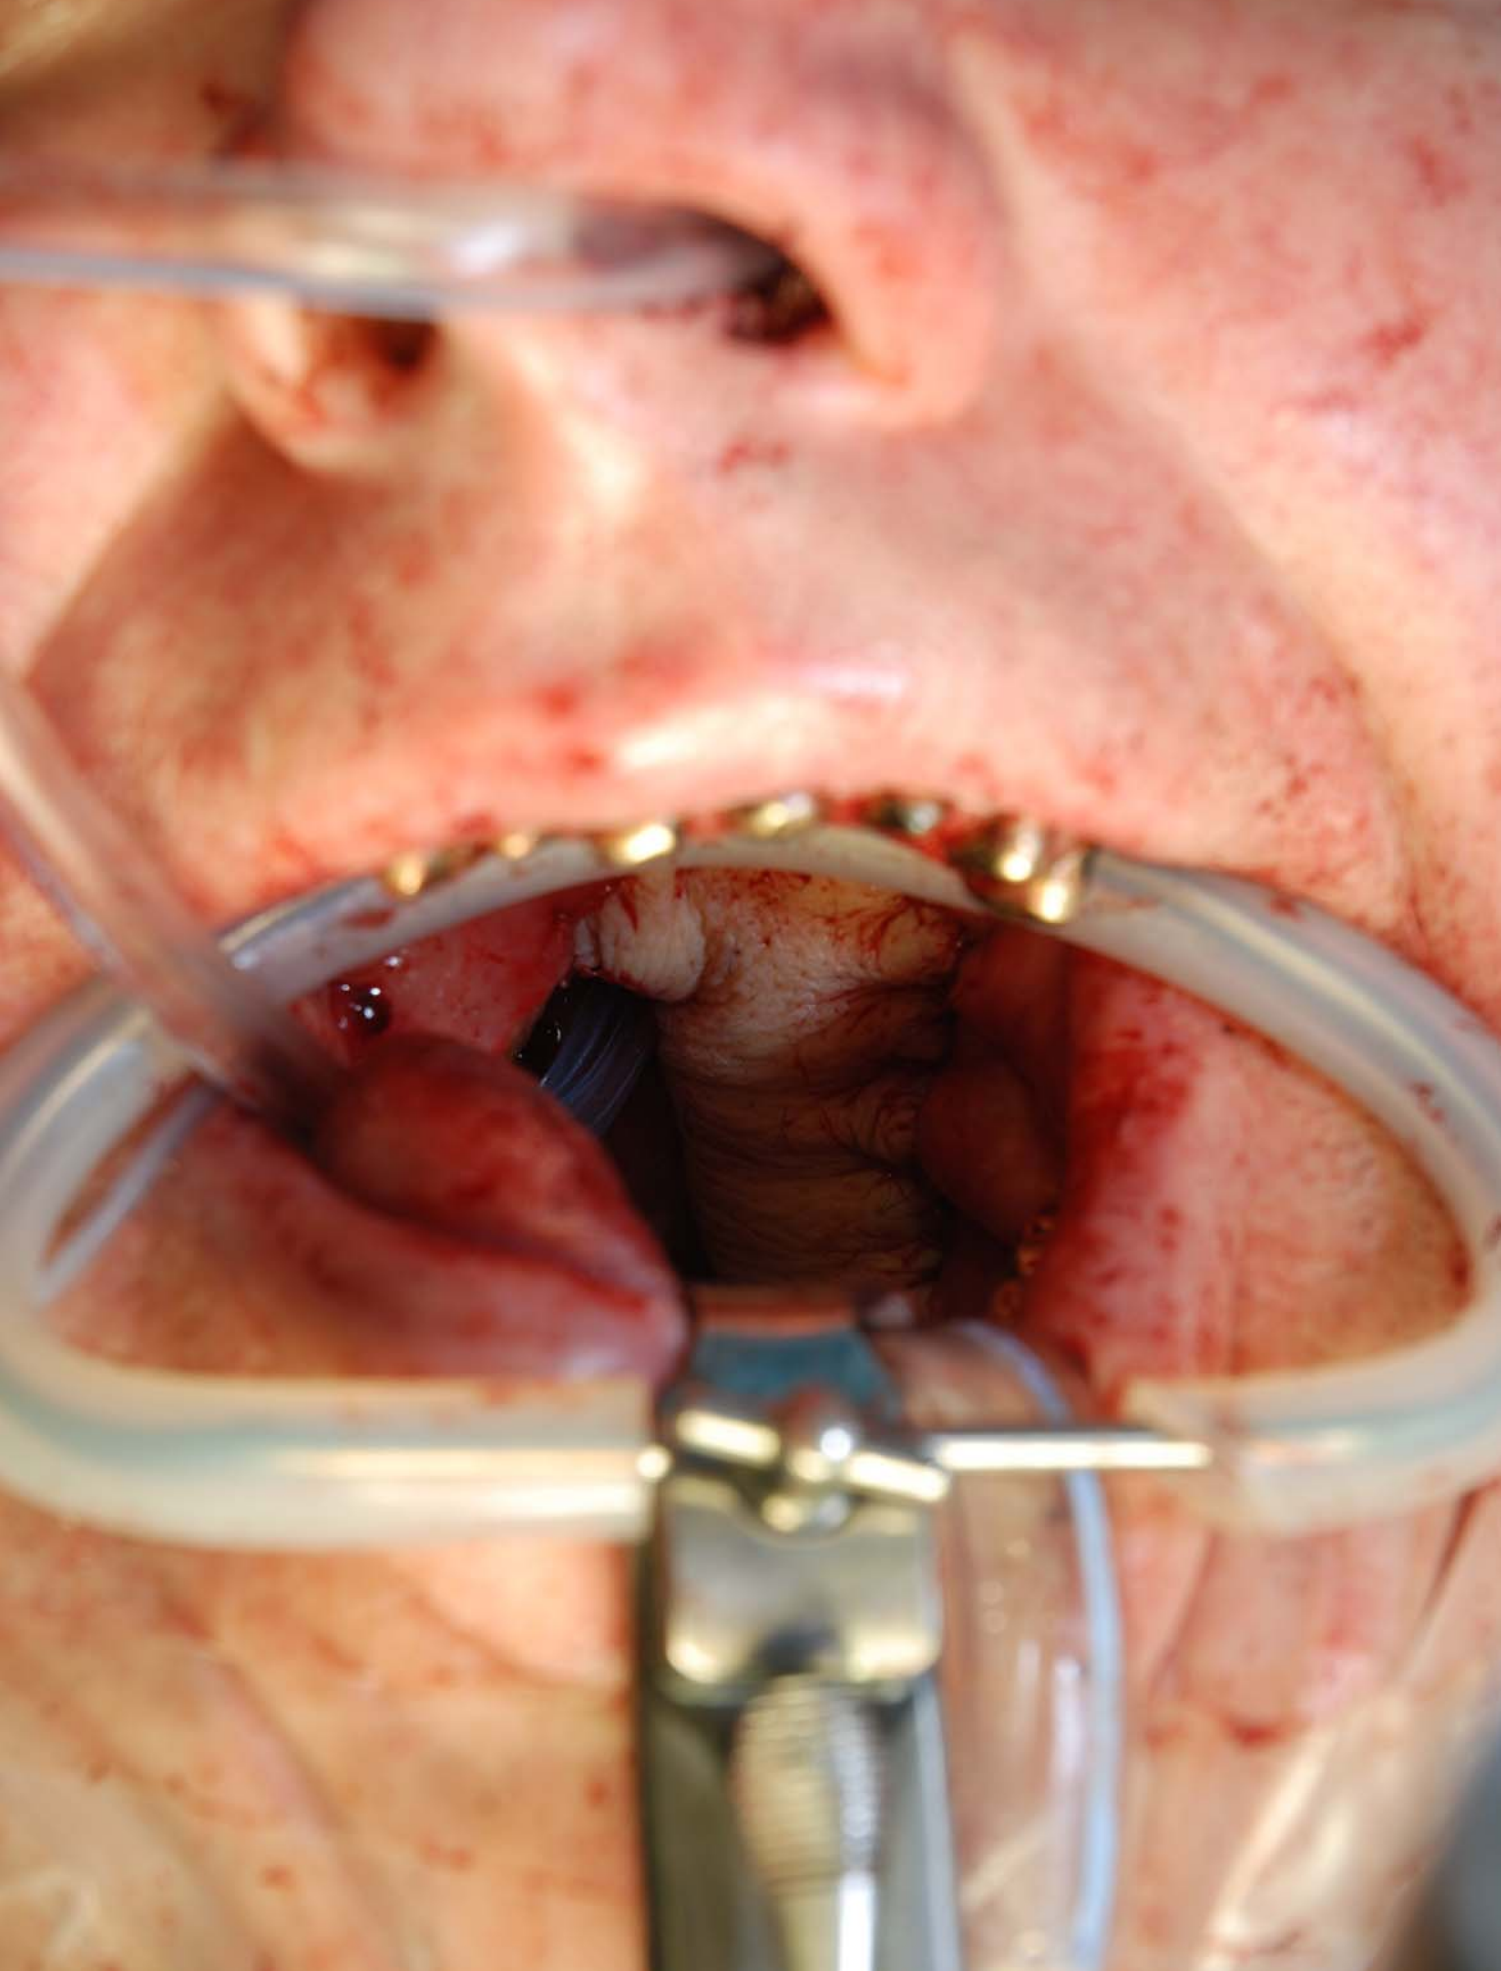

Supplement: MOESM3 [file 9670120]
